# Supplementary material for: The biogenesis of CLEL peptides involves several processing events in consecutive compartments of the secretory pathway
Source: eLife. 2020 Apr 16;9:e55580. doi: 10.7554/eLife.55580 (PMC7162652; doi:10.7554/eLife.55580)
Supplement: Figure 1—source data 1. [file elife-55580-fig1-data1.xlsx]

## Sheet: Figure 1A
wt	CLEL6 EPI1-1	CLEL6 EPI1-2	CLEL6 EPI1-3
44	0	30.735	8.427		statistics: two-tailed t-test				p-value
34	22.166	60.068	26.565			wt	vs	CLEL6 EPI1-1	<0.0001
32	1.469	0	24.905			wt	vs	CLEL6 EPI1-2	<0.0001
27	11.31	22.38	9.866			wt	vs	CLEL6 EPI1-3	<0.0001
25	1.548	3.668	31.122
8	0	5.826	7.696
43	89.91	16.699	41.634
32	2.862	0	44.119
47	0	3.772	4.399
36	1.364	40.236	20.171
53	12.2	53.973	27.44
33	11.889	0	55.421
59	89.82	8.366	11.31
52	0	25.56	18.435
83	0	8.344	27.255
16	3.814	0	0
4	0	9.728	1.685
33	14.797	10.981	14.036
32	8.005	17.571	11.31
82	2.454	16.39	24.228
4	0	4.135	10.713
24	6.147	10.739	54.689
27	0	14.036	26.003
54	11.31	18.435	0
75	1.685	2.246	0
76	0	53.13	3.468
40	15.255	25.75	41.055
21	24.057	48.504	9.819
55	34.346	3.918	25.677
38	13.57	0.764	4.574
56	4.022	17.879	3.918
13	3.759	14.381	16.699
81	27.013	13.799	0
25	21.501	28.811	5.194
31	44.657	10.923	39.611
48	0	13.092	46.394
44	0	23.629	12.875
11	16.871		20.072
17	9.904		8.366
32	11.701		10.305
32	38.723		2.862
21	11.848		40.314
20	30.279		30.964
24	3.705		5.906
38	0		0
24	25.504		12.995
59	43.025		16.504
31	30.35		40.815
50	8.276		0
21	43.683
35	0.666
56	56.094
59
13
66
33
12
22
32
28
35
40
34
52
65
36
38
67
32
38
51
32
72.121
36.384
28.54
31.185
42.709
49.667
22.249
63.435
34.439
47.816
35.702
39.369
37.405
89.955
53.746
27.255
23.806
35.272
23.629
65.556
26.04
21.448
36.262
10.305
20.674
17.301
55.886
7.853
34.509
48.652
12.529
52.815
16.928
48.013
89.955
55.923
42.709
68.199
19.359
43.919
39.56
46.848
55.257
31.185
39.036
7.125
45.924
30.964
33.977
24.404
37.875
52.472
12.724
16.113
29.899
19.502
69.55
24.179
21.398
41.987
35.218
40.914
57.407
35.362
15.959
39.528
65.266
46.398
56.07
23.356
33.111
34.442
37.331

## Sheet: Figure 1B
wt	wt	CLEL6 EPI1-1	CLEL6 EPI1-1	CLEL6 EPI1-2	CLEL6 EPI1-2	CLEL6 EPI1-3	CLEL6 EPI1-3
control	peptide	control	peptide	control	peptide	control	peptide
45	92	42	52	43	27	56	69		statistics: two-tailed t-test					p-value
50	70	38	33	41	46	41	63			wt	control	vs	peptide	0.2889
30	43	57	36	26	31	21	62
32	21	18	41	13	63	58	50			CLEL6 EPI1-1	control	vs	peptide	0.0033
39	29	37	42	26	50	40	51
29	26	56	32	44	52	27	27			CLEL6 EPI1-2	control	vs	peptide	0.0054
31	16	31	35	42	43	16	42
34	14	28	79	38	46	23	35			CLEL6 EPI1-3	control	vs	peptide	0.0101
30	36	45	38	10	38	18	37
36	44	37	27	41	90	44	34
25	84	32	36	29	53	35	21
42	32	27	17		28	26	28
39	60	31	34		54	19
101	82		38		68	28
79	33		166		75	53
53	16		27		32
81	86		37		59
84	58		27
23	55		84
28	43
59	48
55	57
65	43
87	33
67	48
93	41
23	32
37	35
23	39
34	33
75	49
25	27
43	42
59	39
45	66
25	19
28	37
63	37
86	34
38	18
32	61
23	48
31	33
34	42
25	20
30	21
41	49
43	46
86	75
44	67
52	36
20	40
25	39
37	32
64	22
52	27
46	28
48	41
110	54
27	36
44	33
47	46
93	69
39	55
72	27
47	54
35	34
33	37
23	49
27	77
42	43
49	67
87	29
62	35
57	65
31	50
42	11
20	25
32	27
39	44
97	19
62	38
65	50
51	29
47	40
65	39
27	62
32	48
84	47
51	71
59	52
62	53
43	28
31	44
60	57
53	37
22	35
71	19
32
13
42
25
38
48
28
38
23
49
37
24
21
88
16
26
41
155
106
81
20
31
15
36
27
44
36
9
56
33
75
26
25
38
36
43
7
41
56
21
80
57
18
22
16
90
69
53
27
61
25
33
72
44
12
50
45
43
47
61
81
25
102
81
34
65
22
53
33
58
14
16
45
38
57
23
20
32
43
27
28
69
43
57
44
33
44
35
37
65
37
22
35
26
39
35
75
50
42
17
19
38
20
24
68
22
54
27
35
41
48
43
40
16
19
19
15
85
99
80
49
76
31
25
40
26
26
28
88
60
51
50
45
26
34
36
94
66
108
58
58
41
28
80
49
37
56
62
34
30
41

## Sheet: Figure 1C
wt	CLEL9 EPI1-1	CLEL9 EPI1-2	CLEL9 EPI1-3
31.797	20.63	27.962	74.865		statistics: two-tailed t-test				p-value
84.289	37.348	55.773	28.361			wt	vs	CLEL9 EPI1-1	<0.0001
57.619	38.66	53.13	100.774			wt	vs	CLEL9 EPI1-2	0.0003
44.306	81.254	45.354	27.784			wt	vs	CLEL9 EPI1-3	<0.0001
57.668	45.273	48.814	0
53.973	80.538	38.121	0
81.158	0	59.534	0
98.443	0	49.724	0
90	0	32.615	0
90	0	0	0
90	0	0	0
90	0	55.305	0
90	0	52.943	0
90	0	51.093	0
90	0	0	0
62.992	66.949	0	0
56.616	0	0	0
90.838	0	0	33.95
90.838	0		49.792
90.838	0		68.575
90.838	0		43.018
90.838	0		56.976
90.838	0		0
75.26	0		0
61.336	0		0
80.218	0		0
61.531	0		0
60.255	0		0
66.664	0		0
37.653	0		0
72.255	0		0
45.801
38.33
61.94
66.676
50.44
77.735
39.799
39.806
41.424
56.83
50.194
41.634
47.015
27.584
5.906
25.769
32.11
24.624
41.504
45.918
48.623
27.033
44.323
26.944
12.246
22.834
40.884
9.179
39.106
41.826
40.878
29.673
45.365
24.369
43.315
70.106
47.82
82.338
49.316
60.039
56.31
57.053
73.909
59.859
37.476
29.765
35.079
34.424
55.491
57.622
30.029
41.723
44.891
35.375
36.598
42.75
36.858
76.43
37.694

## Sheet: Figure 1D
wt	wt	CLEL9 EPI1-1	CLEL9 EPI1-1	CLEL9 EPI1-2	CLEL9 EPI1-2	CLEL9 EPI1-3	CLEL9 EPI1-3
control	peptide	control	peptide	control	peptide	control	peptide
45	43	17	36	27	52	34	41		statistics: two-tailed t-test					p-value
50	42	31	26	79	48	87	28			wt	control	vs	peptide	0.1272
30	26	22	12	41	31	17	71
32	20	27	35	35	47	23	52			CLEL9 EPI1-1	control	vs	peptide	0.6076
39	30	37	24	29	39	17	36
29	54	30	22	30	68	22	43			CLEL9 EPI1-2	control	vs	peptide	0.0029
31	16	26	51	20	30	50	23
34	26	51	41	20	45	25	20			CLEL9 EPI1-3	control	vs	peptide	0.0177
30	30	54	67	38	40	22	60
36	34	72	65	30	28	18	61
25	36	44	37	101	25	14	39
42	5	39	45	13	23	38	38
39	45	42	24	14	22	30	66
101	25	47	51	8	47	32	54
79	59	13	34	4	26	24	20
53	40	58	20	7		29	42
81	35	18	88	55		31
84	42	51	54	22		52
23	28	25	44	17		10
28	113	21	29	24		18
59	26	19	35			30
55	30	74	19
65	38	32	50
87	94		41
67	105
93	32
23	25
37	47
23	19
34	39
75	12
25	48
43	52
59	34
45	35
25	89
28	63
63	29
86	50
38	35
32	76
23	34
31	47
34	25
25	51
30	32
41	54
43	25
86	25
44	22
52	63
20	37
25	64
37	39
64	55
52	44
46	49
48	49
110	62
27	49
44	32
47	48
93	30
39	28
72	54
47	20
35	38
33	68
23	54
27	48
42	30
49	17
87	52
62	22
57	55
31	58
42	37
20	43
32	28
39	23
97	36
62	45
65	47
51	10
47	10
65	24
27	35
32	52
84	80
51	31
59	44
62
43
31
60
53
22
71
32
13
42
25
38
48
28
38
23
49
37
24
21
88
16
26
41
155
106
81
20
31
15
36
27
44
36
9
56
33
75
26
25
38
36
43
7
41
56
21
80
57
18
22
16
90
69
53
27
61
25
33
72
44
12
50
45
43
47
61
81
25
102
81
34
65
22
53
33
58
14
16
45
38
57
23
20
32
43
27
28
69
43
57
44
33
44
35
37
65
37
22
35
26
39
35
75
50
42
17
19
38
20
24
68
22
54
27
35
41
48
43
40
16
19
19
15
85
99
80
49
76
31
25
40
26
26
28
88
60
51
50
45
26
34
36
94
66
108
58
58
41
28
80
49
37
56
62
34
30
41

## Sheet: Figure 1E
wt	tpst-1
62.13	22.36		statistics: two-tailed t-test				p-value
36.56	42.08			wt	vs	tpst-1	<0.0001
47.92	34.7
61.99	39.69
35.42	30.26
44.37	10.8
31.13	17.95
30.15	38.07
48.9	29.54
54.65	42.14
29.25	26.57
54.53	32.02
30.54	22.17
45.3	4.6
54.34	37.48
79.21	39.29
75.74	34.18
47.72	25.11
61.54	28.26
79.15	31.86
118.69	33.87
50.3	19.42
64.93	6.94
73.65	46.44
28.73	10.41
71.57	42.92
39.33	17.5
54.87	45.79
67.38	19.25
58.39	22.85
55.54	27.98
44.5	29.63
60.73	48.23
47.69	34.53
59.16	35.06
42.92	29.87
76.96	5.19
47.36	14.96
46.63	23.53
88.55	29.86
81.87	44.49
44.55	21.84
27.18	50.28
34.34	29.45

## Sheet: Figure 1F
tpst-1	tpst-1	tpst-1	tpst-1
control	CLEL6	control	CLEL9
64.607	40.33	11.57	59.531		statistics: two-tailed t-test					p-value
56.976	50.488	7.24	37.946			tpst-1	control	vs	CLEL6	<0.0001
65.283	55.605	47.39	50.345
39.289	54.625	53.13	49.819			tpst-1	control	vs	CLEL9	0.0061
74.091	100.653	14.04	67.16
74.604	62.443	31.67	44.363
25.379	91.749	48.18	58.527
62.241	82.113	32.01	78.832
11.889	59.243	42.14	40.436
59.789	89.914	54.62	62.902
33.254	35.293	42.51	76.85
56.746	45.67	19.37	38.811
32.471	109.243	46.85	59.959
51.34	72.605	49.76	59.184
15.255		14.93	65.608
65.225		21.36	52.943
37.875		59.04	22.376
39.806		42.96	49.34
14.036		32.68	47.691
39.806		32.47	46.269
		49.19	67.32
		39.19	50.15
		48.42	59.56
		35.13	81.87
		43.09	53.256
		21.36	70.008
		24.37	48.492
		31.68	78.559
			41.055
			78.264
			46.832
			61.699

## Sheet: F1-FS2B
wt	CLEL6:EPI10-1	CLEL6:EPI10-2	CLEL6:EPI10-3
37.57	15.75	45	54.68		statistics: two-tailed t-test				p-value
78.69	92.16	54.46	18.87			wt	vs	CLEL6 EPI10-1	0.001
49.49	33.9	70.35	22.71			wt	vs	CLEL6 EPI10-2	0.001
84.96	22.81	32.36	11.17			wt	vs	CLEL6 EPI10-3	<0.0001
126.87	100.31	28	14.99
98.13	80.73	47.34	25.94
50.6	90	46.15	24.88
64.44	51.91	50.44	31.11
47.18	53.51	14.04	54.46
45.99	26.57	34.19	25.66
73.61	22.78	42.37	42.06
39.37	14.93		15.21
127.38	36.67		39.87
113.2	25.85		14.53
44.52	15.1		14.53
45.69	17.44		56.85
104.41	91.91		74.67
26.03	12.88		59.81
88.26	25.07		51.01
126.87	72.79		7.48
117.42	32.47		33.11
30.82			35.31
111.46
84.7
116.57
90.79
106.95
129.94
101.47
74.06
147.62
97.13
108.83
78.11
62.19
61.19
98.18
103.22
62.97
102.96
155.37
47.45
63.44
63.02
107.43
41.77
31.5
25.35
23.72
32.79
41.87
41.7
41.93
35.49
31.87
27.34
29.75
29.45
19.51
30.47
32.42
20.19
13.56
33.93
83.61
23.81
31.79
17.92
55.91
22.73
63.87
40.86
85.73
35.54
27.15
23.92
68.2
40.1
29.7
14.65
48.62
65.7
56.26
32.37
123.27
80.75
24.68
36.85
28.2
15.35
21.7
28.09
53.19
73.5
29.78
27.38
18.87
18.44
10.86
30.54

## Sheet: F1-FS2C
wt	CLEL9:EPI10-1	CLEL9:EPI10-2	CLEL9:EPI10-3
72.708	37	19.759	36.954		statistics: two-tailed t-test				p-value
45.824	37	43.378	16.659			wt	vs	CLEL9 EPI10-1	<0.0001
43.99	29.129	45.498	28.262			wt	vs	CLEL9 EPI10-2	0.0003
58.548	47.603	40.601	45.999			wt	vs	CLEL9 EPI10-3	<0.0001
73.413	24.88	29.869	45
39.665	32.949	21.523	38.66
61.686	14.467	26.241	24.88
41.946	56.407	40.601	32.949
50.84	38.089	45	14.467
60.803	26.565	52.963	56.407
46.081	27.379	50.599	38.089
35.218	20.959	62.241	26.565
36.459	14.992	45.306	27.379
81.969	27.563	26.565	20.959
46.011	36.277	33.69	14.992
72.108		12.095	27.563
29.782		35.288	36.277
16.699		47.283
50.906		29.318
65.434
65.402
81.87
59.882
53.621
60.709
37.484
57.16
96.94
59.508
50.86
39.177
57.492
39.693
37.255
59.433
43.668
49.927
83.458
66.038
46.312
56.746
75.926
55.044
73.828
60.461
66.697
72.408
37.318
58.627
41.831
64.537
69.178
81.967
40.52
58.024
67.62
54.624
38.826
88.076
65.22
-14.744
81.833
82.405
44.772
24.749
97.15
45.067
55.109
-29.055
34.879
67.453
44.811
86.634
66.196
68.385
40.77
41.509
53.09
49.323
38.367
67.002
43.854
28.824
92.306
85.426
50.176
45
61.105
59.584
52.614
54.775
65.52
51.633
45.906
43.474
37.632
66.801
61.254
55.46
50.711
34.992
46.703
66.628
21.566
73.752
49.647
