# Supplementary material for: The biogenesis of CLEL peptides involves several processing events in consecutive compartments of the secretory pathway
Source: eLife. 2020 Apr 16;9:e55580. doi: 10.7554/eLife.55580 (PMC7162652; doi:10.7554/eLife.55580)
Supplement: Figure 4—source data 1. [file elife-55580-fig4-data1.xlsx]

## Sheet: Figure 4C
wt		tpst-1
control		control	CLEL6 wt	CLEL6 D71A	CLEL9 wt	CLEL9 D66A
60.965		69.937	48.061	61.679	77.413	46.081			statistics: two-tailed t-test				p-value
43.394		43.472	70.603	47.575	70.412	63.435				tpst-1	vs	CLEL6 wt	<0.0001
80.593		94.399	62.694	50.089	76.982	63.079				tpst-1	vs	CLEL6 D71A	ns
76.43		69.928	74.619	90	38.66	70.79				tpst-1	vs	CLEL9 wt	<0.0001
77.018		68.056	74.148	77.171	41.319	88.854				tpst-1	vs	CLEL9 D66A	<0.0103
41.269		8.835	54.332	51.155	50.947	60.255
94.786		56.31	67.551	19.116	101.31	43.493
89.523		29.567	50.428	60.461	70.185	84.114				controls			p-value
56.607		32.905	97.479	68.739	64.832	52.681				wt	vs	tpst-1	<0.0001
82.625		45	48.828	53.691	34.959	55.305
54.164		55.105	39.218	23.989	50.716	5.935
80.968		28.413	74.789	57.246	71.944	24.429
49.16		9.545	53.765	36.797	27.125	24.31
44.051		60.945	18.332	63.008	37.739	59.036
79.864		26.611	59.122	61.832	53.33	46.175
37.979		32.983	42.354	39.906	28.237	22.101
88.152		18.765	71.327	44.37	73.985
98.915		36.102	68.467	64.231	51.843
90.866		32.645	43.37	25.854	28.846
109.983		30.466	51.34	44.143	38.582
45.796		26.841	33.217	55.934	102.804
46.881		25.346	102.894	75.716	68.477
67.515		53.13	23.054	90
63.625		66.801	51.917	15.255
109.983		55.67	84.596	56.31
59.441		41.005	36.87
59.477		26.934	65.72
64.733			68.199
61.474			19.494
76.718			85.355
51.741			74.208
104.621
55.229
78.542
87.732
80.304
55.386
55.558
113.136
72.9		42.56	60.81	53.05	26.14	53.18
48.8		52.08	57.53	56.5	14.25	29.6
52.6		56.94	27.3	27.28	79.66	38.43
88.39		57.53	64.52	45.51	68.01	63.71
59.12		74.79	45.48	42.27	61.34	42.37
60.96		61.22	54.69	73.33	34.83	36.5
48.09		57.35	37.77	95.71	37.22	33.21
68.84		23.45	114.34	14.74	25.78	30.83
36.55		58.24	69.55	103.56	54.74	44.22
65.41		49.65	37.67	47.76	50.61	46.6
58.02		45.37	39.63	28.36	31.89	56.21
57.75		33.8	63.12	28.3	30.54	45.96
47.92		26.2	51.55	45	25.23	33.69
76.17		28.17	75.41	31.28	46.5	60.21
75.96		61.65	31.69	38.9	40.49	55.62
79.3		92.16	53.31	32.76	50.19	26.46
85.97		36.87	61.62	32.08	34.77	97.77
61.01		36.32	64.93	94.65	64.29	63.52
66.09		47.95	79.56	45	73.12	96.85
51.53		49.19	60.35	44.56	37.39	23.91
72.68		42.34	80.94	25.13	43.68	44.17
47.12		61.7	65.54	46.01	40.96	24.68
64.65		26.57	42.71	41.99	66.62	53.2
54.07		15.06	48.17	36.29	114.5	42.13
70.45		45	50.37	29.54	45.25	24.92
34.16		24.56	24.45	42.38	52.15	43.52
42.96		55.67	59.04	19.95	57.68	20.34
70.97		47.34	55.86	28.12	28.8	27.3
39.48		32.68	97.95	91.58	63.77	70.95
65.25		63.97	83.06	35.73	82.55	73.27
33.17		52.39	37.46	32.74	63.14	26.26
92.73		52.25	17.73	44.16	120.96	2.88
59.79		28.67	40.28	39.84	68.2	43.09
37.81		74.21	59.94	73.34	53.34	29.2
38.16		30.96	41.93	67.83	48.85	56.89
73.67		37.2	34.88	16.82	75.96	54.02
77.21		22.04	48.66	18.84	67.62	26.57
48.91		17.65	61.84	55.68	56.14	18.84
66.37		52.77	71.31	41.02	29.57	53.13
41.33		57.1	42.29	41.48	34.93	34.48
28.47		32.05	66.54	39.81	38.02	36.65
80.07		23.53	45.91	50.11	45.28	32.06
61.4		62.45	31.91	27.82	34.98	30.35
43.18		32.47	33.36	39.81	39.04	5.74
38.42		3.28	107.32	84.29		22.54
		10.31	75.29	13		24.73
		38.14		46.32		26.86
		44.37		47.1
				72.81
				31.73
				20.73
88.47		50.29	74.3	50.53	76.26	61.89
90.48		85.57	50.56	52.61	62.91	83.33
78.62		32.91	24.08	39.76	73.44	75.96
90.06		55.31	22.27	26.73	71.13	67.71
62.17		75.56	66.8	38.94	42.59	70.54
66.84		37.66	42.39	109.86	81.92	75.18
64.37		64.94	97.04	105.42	48.15	78.46
91.45		71.3	61.9	12.53	29.49	47.89
49.64		21.5	60.5	36.9	73	57.78
49.76		26.57	41.63	37.04	39.56	62.22
79.79		42.4	74.34	70.01	77.08	69.96
99.04		27.58	50.69	58.65	38.54	67
85.03		49.4	64.77	29.75	66.26	89.46
79.54		28.56	70.89	54.72	87.14	66.56
52.87		59.25	54.26	43.32	4.27	25.86
73.74		49.64	45.52	54.16	39.2	58.4
53.13		48.12	80.13	84.49	86.68	51.49
60.52		19.44	68.39	55.31	49.9	48.07
76.73		62.73	47.91	46.91	46.33	65.2
79.02		40.51	81.54	37.83	75.98	65.09
51.68		37.88	54.73	49.47	51.74	68.55
43.3		73.07	83.69	83.08	24.82	88.59
62.97		48.51	62.97	62.72	69.17	65.34
27.7		57.71	82.88	48.63	59.9	77.22
56.35		32.31	72.55	86.73	76.58	67.43
45.18		38.26	47.48	73.41	58.42	72.71
78.29		36.09	95.78	23.68	92.03	64.12
45.67		58.24	70.75	30.32	71.96	66.04
20.54		68.5	60.08	27.86	60.8	53.81
77.2		47.04	53.24	24.77	88.4	58.93
63.88		27.34	65.28	56.44	90	68.73
70.87		53.51	44.11	35.92	47.37	62.11
43.69		46.84	37.24	14.25	70.02	56.79
67.27		35.75	89.48	28.74	63.34	32.88
50.53		25.68	68.02	25.55	50.8	49.94
41.88		34.55	88.24	61.31	93.04	49.99
34.29		29.19	56.73	27.59	25.58	17.08
67.43		39.38	68.92	37.5	45	77.52
66.74			71.57	45.11	66.44	56.49
43.92			46.66	20.12	42.13	49.58
			66.6	25.86	59.99
			80.25	18.2	88
					56.49
					38.39
					74.26
