# Supplementary material for: The biogenesis of CLEL peptides involves several processing events in consecutive compartments of the secretory pathway
Source: eLife. 2020 Apr 16;9:e55580. doi: 10.7554/eLife.55580 (PMC7162652; doi:10.7554/eLife.55580)
Supplement: Figure 5—figure supplement 2—source data 1. [file elife-55580-fig5-figsupp2-data1.xlsx]

## Sheet: F5-FS2A
wt	sbt3.8
54.851	46.796			statistics: two-tailed t-test				p-value
70.953	67.292				wt	vs	sbt3.8	0.6758
47.503	45.919
89.1	28.619
28.435	71.168
61.718	50.839
51.994	59.288
39.379	53.564
61.356	29.574
41.374	52.68
53.032	57.607
46.075	15.647
57.566	46.621
85.301	74.813
50.906	85.941
90.64	51.748
28.926	49.862
59.71	50.946
46.717	39.967
54.759	137.148
49.635	28.175
58.188	31.292
39.898
57.426
105.255
78.236
55.787
58.054
32.72
82.801
124.38
41.186
55.408
61.509
99.246
44.861
79.926
74.785
59.704
8.352
38.341
33.204
66.297
69.014
41.514
48.945
29.932
21.419
50.906
66.39
44.415
3.064
61.449
25.811
32.449
67.697
64.904
81.491
26.932
77.164
72.474
46.647
39.169
62.93
65.729
26.649
106.928
17.742
40.621
64.341
49.961
30.134
128.14
64.849
84.806
28.505
35.754
